# Supplementary material
Source: PubMed Central journal article supplement (PMC6543732)
Supplement: plantbiotechnology-35-1-18.0129b-s001.pdf [file plantbiotechnology-35-1-18.0129b-s001.pdf]

Table S1. Sequences of primers used for real-time RT-PCR

| Primers | Sequences                 |
|---------|---------------------------|
| ETT-F   | ATCATTGAGATTCCAGAGGGTCTT  |
| ETT-R   | GGCTCCACCATCCGAACA        |
| ARF4-F  | CAGGTGTTATGGACCTGGATAGG   |
| ARF4-R  | CCAGCAAATTGCGGGAAT        |
| KAN2-F  | AAGGAACTAGATGGAAAGTGCTCAA |
| KAN2-R  | GCTTGTTCCCGAGATGCTTG      |
| FIL-F   | GCCCACTTCCCCACATAC        |
| FIL-R   | TTGGTTTTCTTCACGGGTGA      |
| YAB5-F  | ACGCCCTAATTTCCAGGCAAC     |
| YAB5-R  | GTTGCTCAGTTATGGTACGAG     |
| PHB-F   | GCTGTTGACTGGGTTTCAGATGA   |
| PHB-R   | GCGAAATAGCGACTATGCCAAT    |
| BP-F    | TGTTGTTTCCACATATGAGCTCTCT |
| BP-R    | TCATGATCAGATCGGAAGCAAT    |
| KNAT2-F | TTCCGCTCGACGGAAGAC        |
| KNAT2-R | AATCGGACGGCATCATCAAC      |
| STM-F   | CTCCTCCCCAAGGAACTAAGAAC   |
| STM-R   | TCCTCCTGCAACGATTTCG       |
| ACT2-F1 | TCGTTTCTATGATGCACTTGTGTGT |
| ACT2-R1 | ACAAAGGAATAAAGAGGCATCAAT  |
